# Supplementary material for: Implementation of an open source algorithm for particle recognition and morphological characterisation for microplastic analysis by means of Raman microspectroscopy
Source: Royal Society of Chemistry journal article supplement (doi:10.1039/c9ay01245a), 2019-01-01
Supplement: c9ay01245a1.pdf [file c9ay01245a1.pdf]

1 Electronic Supplementary Information

2

3 Implementation of an Open Source Algorithm for Particle Recognition and Morphological

4 Characterization for Microplastic Analysis by Means of Raman Microspectroscopy

5

6 Philipp M. Anger<sup>1</sup>, Leonhard Prechtl<sup>1</sup>, Martin Elsner, Reinhard Niessner and Natalia P. Ivleva

7 Institute of Hydrochemistry, Chair of Analytical Chemistry and Water Chemistry, Technical

8 University of Munich, Marchioninstr. 17, 81377 Munich/DE

9 <sup>1</sup>shared first authorship

10 \*Corresponding Author: Natalia P. Ivleva, [natalia.ivleva@tum.de](mailto:natalia.ivleva@tum.de)

11 Email addresses: Philipp M. Anger – [p.anger@tum.de](mailto:p.anger@tum.de); Leonhard Prechtl – [leonhard.prechtl@tum.de](mailto:leonhard.prechtl@tum.de);

12 Martin Elsner – [m.elsner@tum.de](mailto:m.elsner@tum.de); Reinhard Niessner [reinhard.niessner@ch.tum.de](mailto:reinhard.niessner@ch.tum.de);

13

14 In the Electronic Supplementary Information (ESI) we present further information to clarify our  
15 statements made in the main manuscript. In Figure S1 we display the Euclidian distance map of figure  
16 2 in the main manuscript. A magnified section of Figure 2e from the main manuscript is shown in Figure  
17 S2. From Figure S3 to Figure S20 exemplary processed images are displayed.

18

19 **Euclidian Distance Map**

20

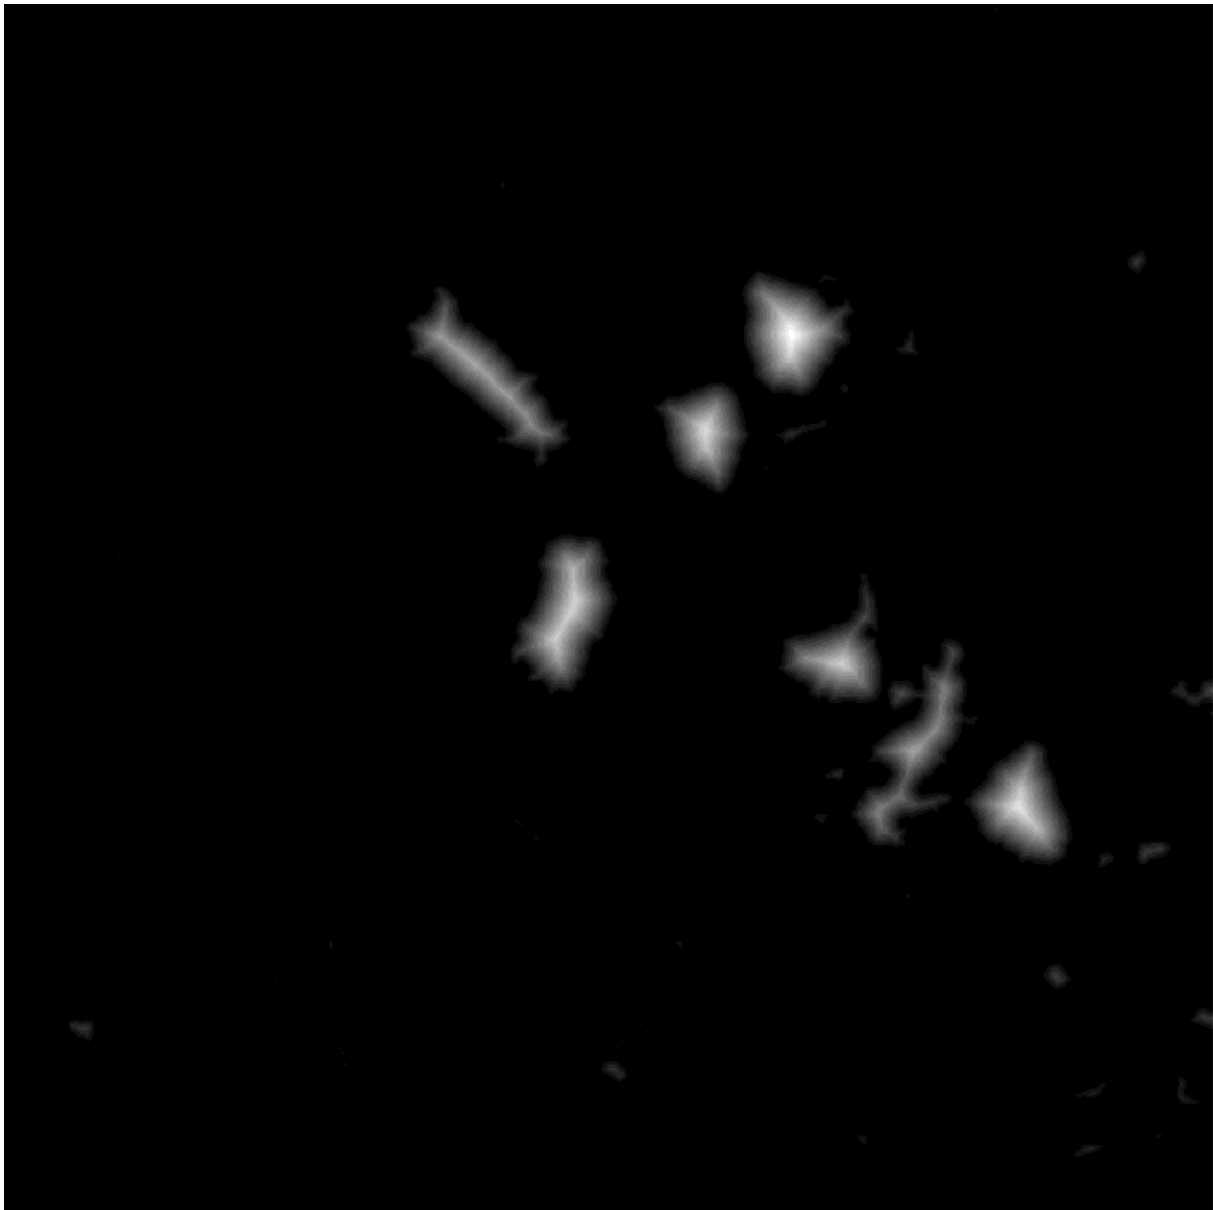

21

22 *Figure S1: Euclidian distance Map created from fig 2 of the main manuscript.*

23

24 Magnified section of figure 2e of the main manuscript

25

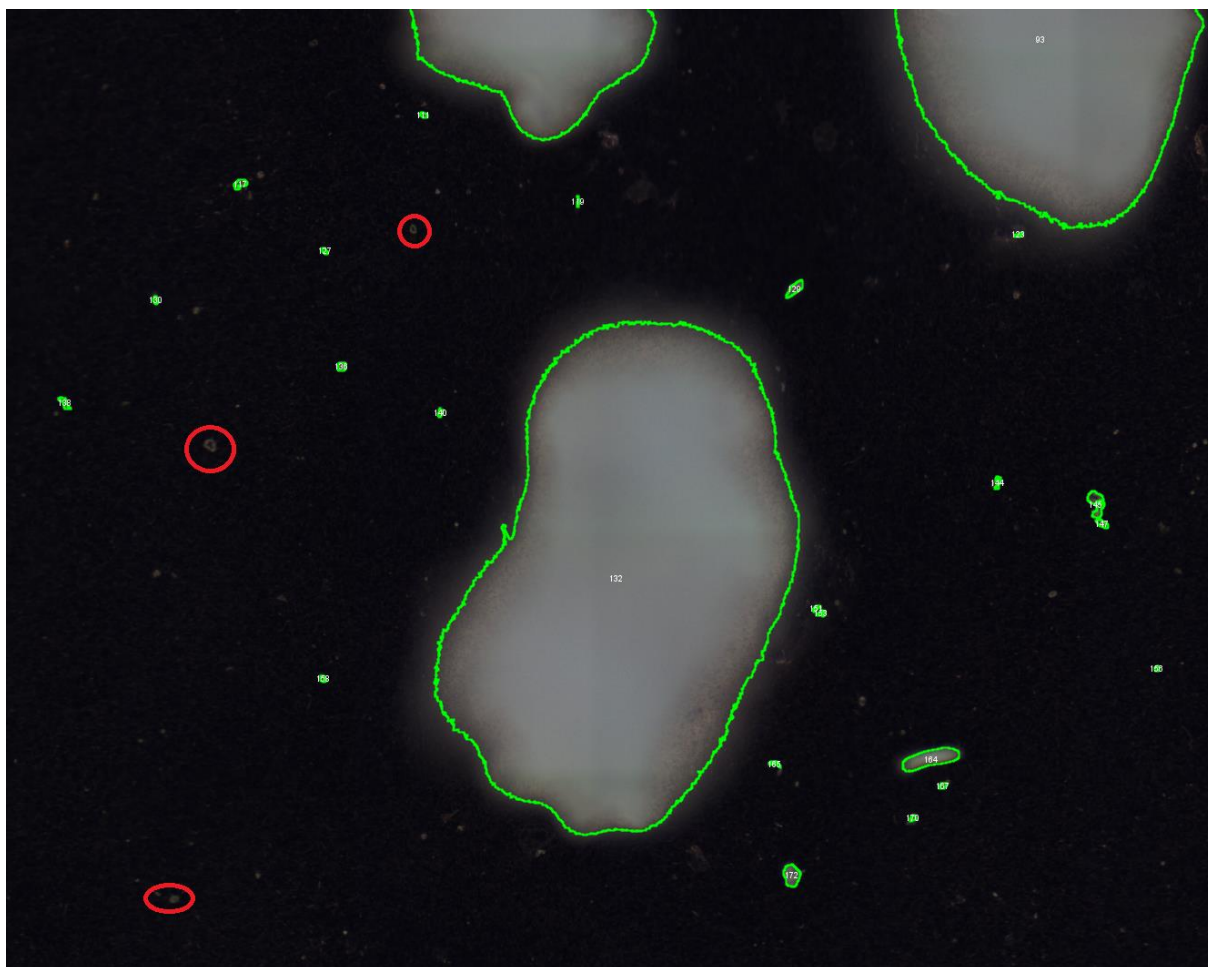

26

27 *Figure S2: Magnified section of Figure 2e from the main manuscript. Red encircled particles have not*  
28 *been found by the algorithm due to low intensity values of corresponding pixel. Green encircled*  
29 *particles are particles found by the algorithm.*

30

31 Examples of processed images from published data

32 The processed images are taken from original publications and except for some pictures where the scales  
33 where masked, the images where processed with our Open Source program without further editing. All  
34 figures follow the same scheme: Left – original image; middle – processed image without watershed;  
35 right – processed image with watershed;

36 All images but one were processed with default values:

37 protocol – Single Image

38 min. pixels = 20 (5 for Figure S18 **Fehler! Verweisquelle konnte nicht gefunden werden.**)

39 min. size /  $\mu\text{m} = 0$

40 max. size /  $\mu\text{m} = 100\,000$

41 resolution /  $\text{px } \mu\text{m}^{-1} = 1$

42 The setting for white particles is given for every figure.

43

44 The comparison of the results of the algorithm and the human expert yields two possible errors: false  
45 negatives and false positives. False negatives are worse because these errors describe existing particles  
46 which are not found. These errors therefore induce an underestimation of the contaminant under  
47 observation. False positives (additional particles or wrong segmentation of existing particles) have the  
48 drawback that they induce a longer measurement time and smaller particle sizes. The accordance value  
49 in this work gives the accordance of the existing particles (human expert) and the ones the algorithm  
50 has found. False positives are subtracted from the overall number of found particles. Thus, every missing  
51 particle or false negative leads to an accordance value below 100%.

52

53  $\text{Accordance} = (N_{\text{algorithm}} - N_{\text{false-positives}}) / N_{\text{human-expert}}$

54  $\text{Accordance in \%} = ((N_{\text{algorithm}} - N_{\text{false-positives}}) / N_{\text{human-expert}}) * 100$

55  $N_{\text{algorithm}}$  = number of particles found by the algorithm

56  $N_{\text{false-positives}}$  = number of false positives, determined by comparison of particles assigned by human  
57 expert and processed image of algorithm

58  $N_{\text{human-expert}}$  = number of particles found by human expert

59

60

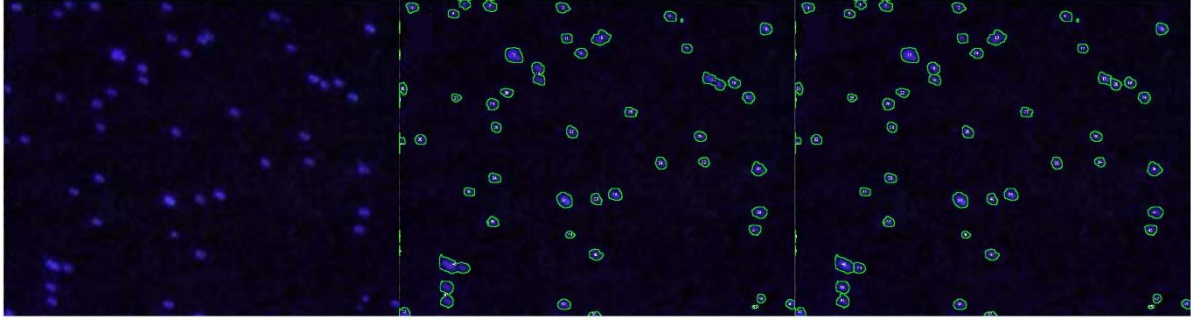

61

62 *Figure S3: Image from Ossmann et al. [1] Figure 4f; “white particles” were looked for.*

63

64 *Table S1: Accuracy or validity of images from Figure S3.*

|                  | # particles | Accordance / % | False negatives | False positives |
|------------------|-------------|----------------|-----------------|-----------------|
| Human Expert     | 50          |                |                 |                 |
| Otsu             | 53          | 92.0           | 4               | 7               |
| Otsu + watershed | 57          | 100            | 0               | 7               |

65

66 *Table S2: Reliability or precision of images from Figure S3.*

|                                | # particles | Accordance / % | False negatives | False positives |
|--------------------------------|-------------|----------------|-----------------|-----------------|
| Otsu                           | 53          |                |                 |                 |
| Otsu rotation 90°              | 53          | 100            | 0               | 0               |
| Otsu vertical flip             | 53          | 100            | 0               | 0               |
|                                | # particles | Accordance / % | False negatives | False positives |
| Otsu + watershed               | 57          |                |                 |                 |
| Otsu + watershed rotation 90°  | 57          | 100            | 0               | 0               |
| Otsu + watershed vertical flip | 57          | 100            | 0               | 0               |

67

68

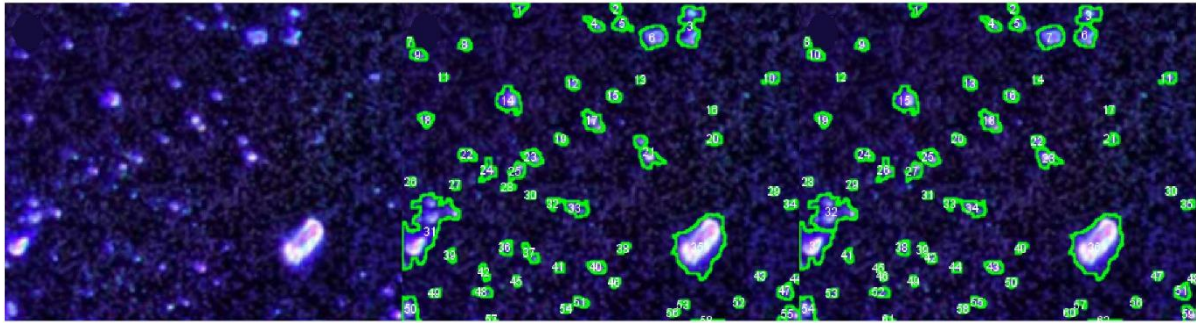

69

70 *Figure S4: Image from Ossmann et al. [1] Figure 4g; “white particles” were looked for.*

71

72 *Table S3: Accuracy or validity of images from Figure S4.*

|                  | # particles | Accordance / % | False negatives | False positives |
|------------------|-------------|----------------|-----------------|-----------------|
| Human Expert     | 53          |                |                 |                 |
| Otsu             | 58          | 79.2           | 11              | 16              |
| Otsu + watershed | 62          | 83.0           | 9               | 18              |

73

74 *Table S4: Reliability or precision of images from Figure S4.*

|                                | # particles | Accordance / % | False negatives | False positives |
|--------------------------------|-------------|----------------|-----------------|-----------------|
| Otsu                           | 58          |                |                 |                 |
| Otsu rotation 90°              | 58          | 100            | 0               | 0               |
| Otsu vertical flip             | 58          | 100            | 0               | 0               |
|                                | # particles | Accordance / % | False negatives | False positives |
| Otsu + watershed               | 62          |                |                 |                 |
| Otsu + watershed rotation 90°  | 63          | 100            | 0               | 1               |
| Otsu + watershed vertical flip | 63          | 100            | 0               | 1               |

75

76

77

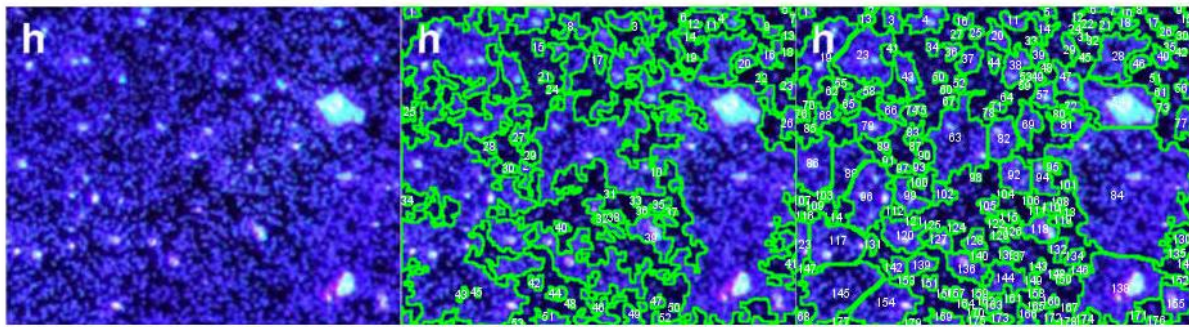

78

79 *Figure S5: Image from Ossmann et al. [1] Figure 4h; “white particles” were looked for.*

80 In

81 Figure S5 a lot of false positives are created due to the over-illumination of this sample. Pores of the  
 82 filter “glow” and are thereby mistaken as particles or parts of particles. Therefore, this image was not  
 83 further evaluated.

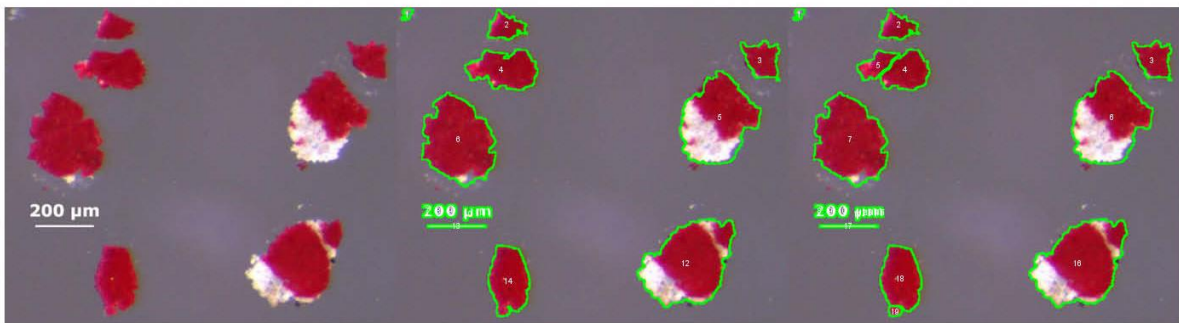

84

85 *Figure S6: Image from K uppler et al. 2018 [2], Figure 1c; “white particles” were looked for.*

86

87 *Table S5: Accuracy or validity of images from Figure S6.*

|                  | # particles | Accordance / % | False negatives | False positives |
|------------------|-------------|----------------|-----------------|-----------------|
| Human Expert     | 8           |                |                 |                 |
| Otsu             | 8           | 100            | 0               | 0               |
| Otsu + watershed | 10          | 100            | 0               | 2               |

88

89 *Table S6: Reliability or precision of images from Figure S6.*

|                                | # particles | Accordance / % | False negatives | False positives |
|--------------------------------|-------------|----------------|-----------------|-----------------|
| Otsu                           | 8           |                |                 |                 |
| Otsu vertical flip             | 8           | 100            | 0               | 0               |
|                                | # particles | Accordance / % | False negatives | False positives |
| Otsu + watershed               | 10          |                |                 |                 |
| Otsu + watershed vertical flip | 10          | 100            | 0               | 0               |

90



91 90° values are missing for Figure S6, due to a limitation in length/width ratio that can be processed by  
92 our open source program. However, all other images showed no deviation by 90° rotation. Therefore,  
93 we recommend to rotate images with unsuitable length/width ratios.

94

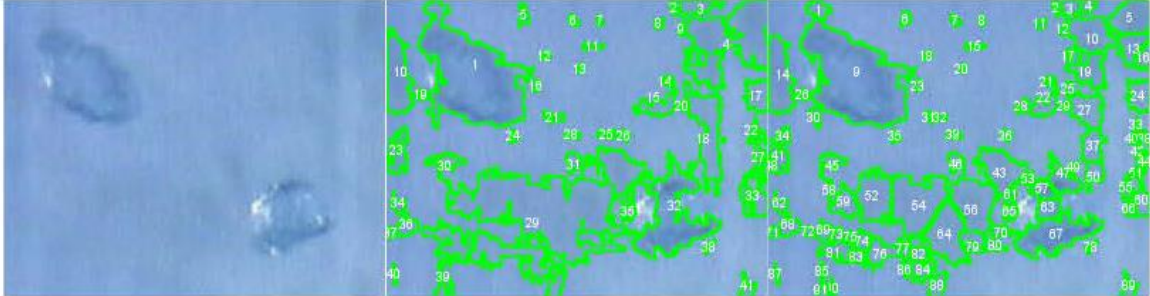

95

96 *Figure S7: Image reproduced from Löder et al. [3] Figure 3j, with permission from CSIRO*  
97 *Publishing; “dark particles” were looked for.*

98

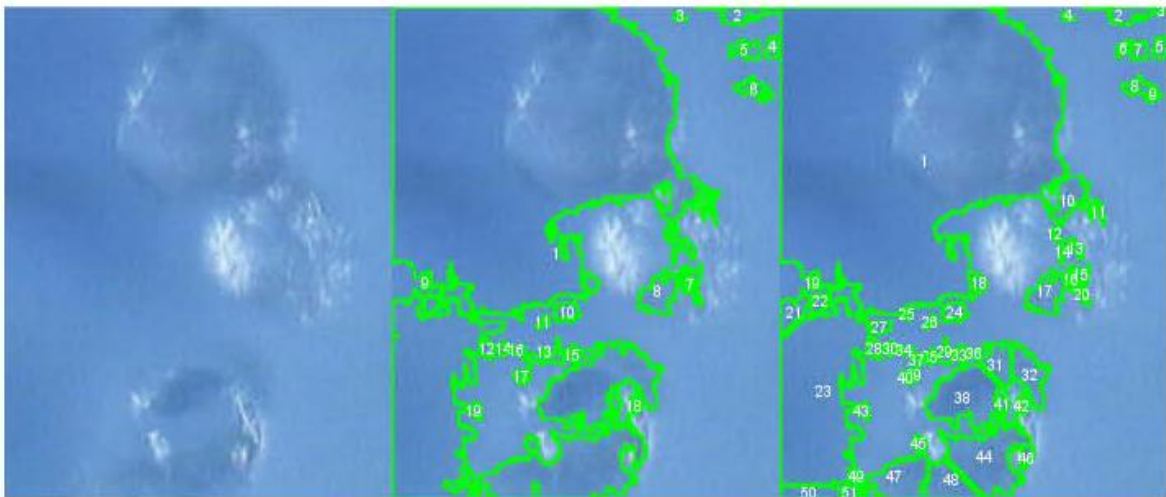

99

100 *Figure S8: Image reproduced from Löder et al. [3] Figure 3d, with permission from CSIRO*  
101 *Publishing; “dark particles” were looked for.*

102

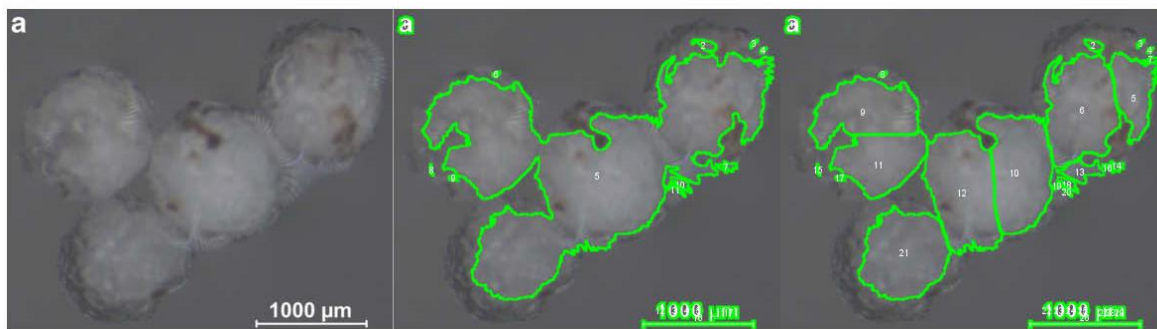

103

104 *Figure S9: Image from Käppler et al. 2016 [4] Figure 1a; “white particles” were looked for.*

105

106 *Table S7: Accuracy or validity of images from Figure S9.*

|                  | # particles | Accordance / % | False negatives | False positives |
|------------------|-------------|----------------|-----------------|-----------------|
| Human Expert     | 4           |                |                 |                 |
| Otsu             | 11          | 75.0           | 1               | 8               |
| Otsu + watershed | 20          | 100            | 0               | 16              |

107

108

109 *Table S8: Reliability or precision of images from Figure S9.*

|                                | # particles | Accordance / % | False negatives | False positives |
|--------------------------------|-------------|----------------|-----------------|-----------------|
| Otsu                           | 11          |                |                 |                 |
| Otsu vertical flip             | 11          | 100            | 0               | 0               |
|                                | # particles | Accordance / % | False negatives | False positives |
| Otsu + watershed               | 20          |                |                 |                 |
| Otsu + watershed vertical flip | 20          | 100            | 0               | 0               |

110

111

112 90° values are missing for Figure S9 due to a limitation in length/width ratio that can be processed by  
 113 our open source program. However, all other images showed no deviation by 90° rotation. Therefore,  
 114 we recommend to rotate images with unsuitable length/width ratios.

115

116

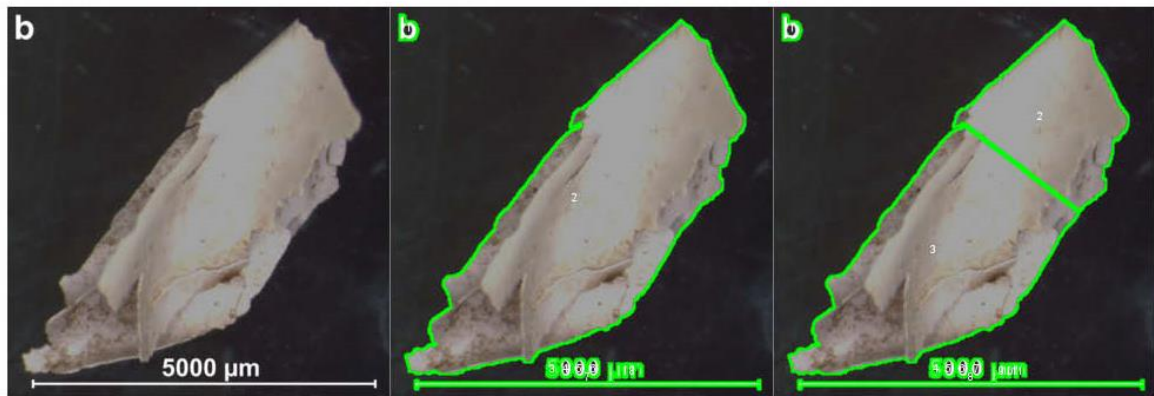

117

118 *Figure S10: Image from Käppler et al. 2016 [4] Figure 1b; “white particles” were looked for.*

119

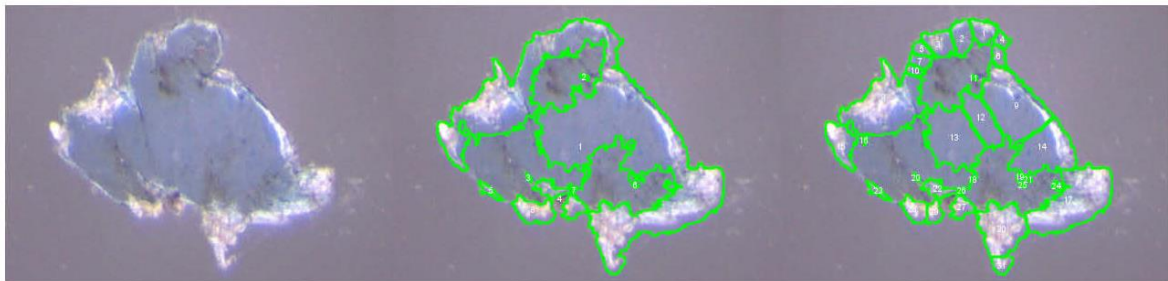

120

121 *Figure S11: Image from Käppler et al. 2018 [2], Figure 1a; “white particles” were looked for.*

122

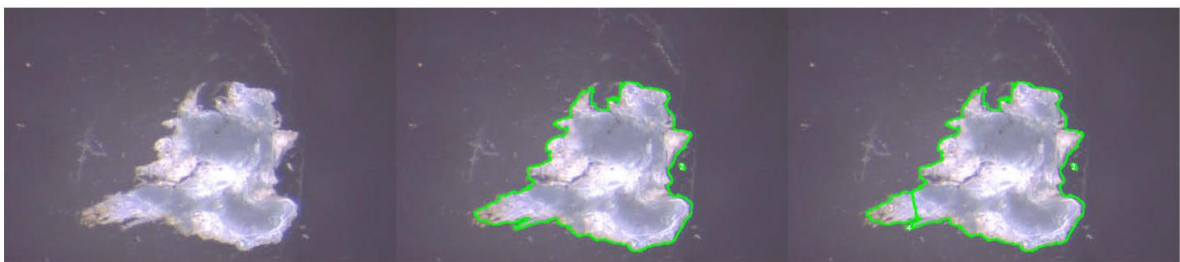

123

124 *Figure S12: Image from Käppler et al. 2018 [2], Figure 1b; “white particles” were looked for.*

125

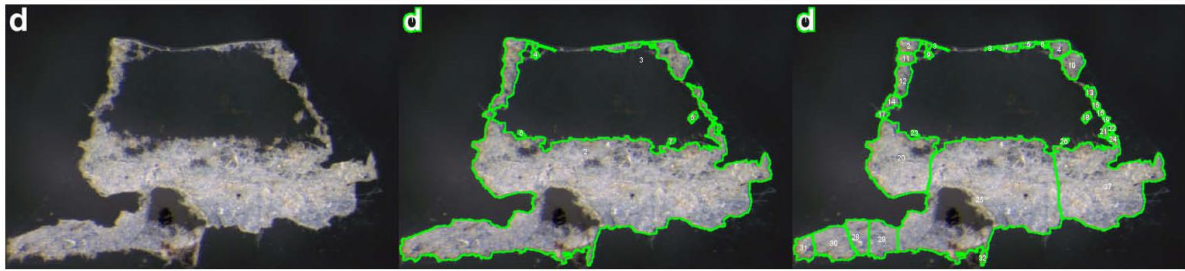

126

127 *Figure S13: Image from Käppler et al. 2018 [2], Figure 1d; “white particles” were looked for.*

128

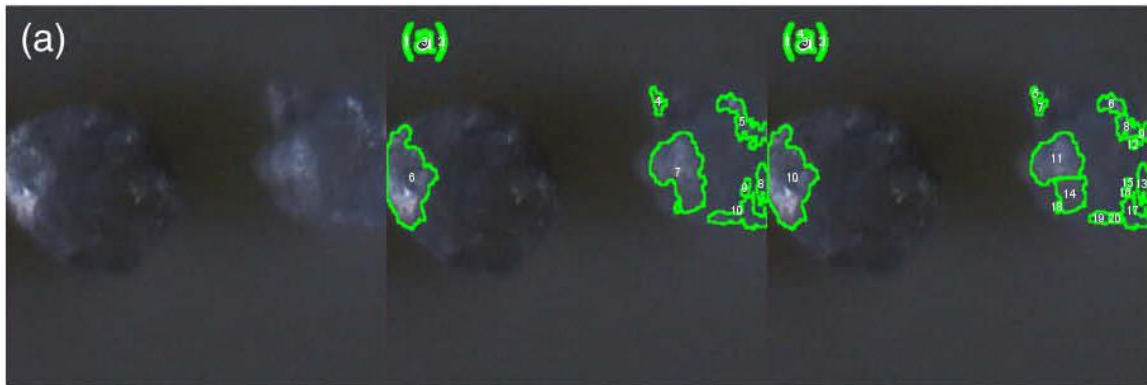

129

130 *Figure S14: Image reproduced from Löder et al. [3] Figure 3a, with permission from CSIRO*  
 131 *Publishing; “white particles” were looked for.*

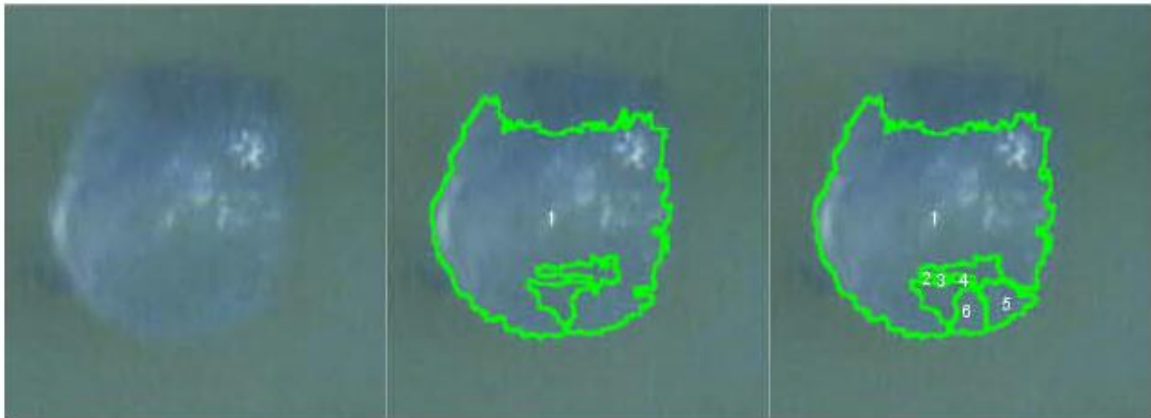

132

133 *Figure S15: Image reproduced from Löder et al. [3] Figure 3g, with permission from CSIRO*  
 134 *Publishing; “white particles” were looked for.*

135

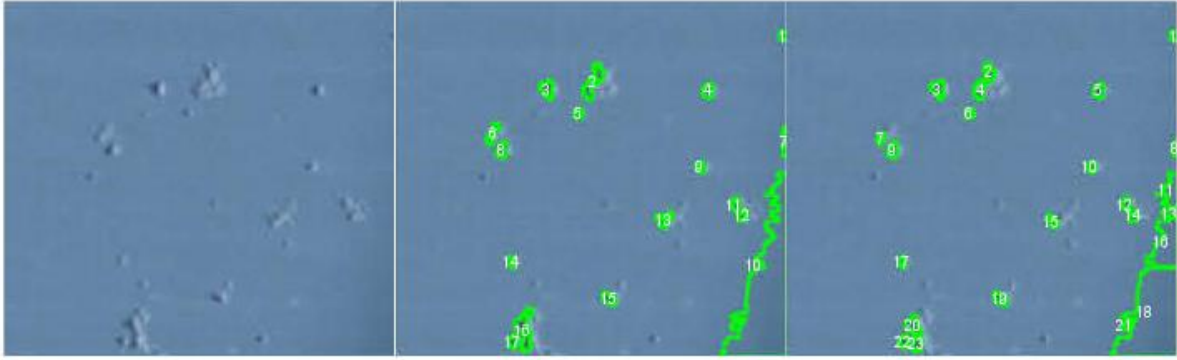

136

137 *Figure S16: Image reproduced from Löder et al. [3] Figure 9a, with permission from CSIRO*  
 138 *Publishing; “white particles” were looked for.*

139

140 *Table S9: Accuracy or validity of images from Figure S16.*

|                  | # particles | Accordance / % | False negatives | False positives |
|------------------|-------------|----------------|-----------------|-----------------|
| Human Expert     | 20          |                |                 |                 |
| Otsu             | 17          | 65.0%          | 7               | 4               |
| Otsu + watershed | 23          | 65.0%          | 7               | 10              |

141

142 *Table S10: Reliability or precision of images from Figure S16.*

|                                | # particles | Accordance / % | False negatives | False positives |
|--------------------------------|-------------|----------------|-----------------|-----------------|
| Otsu                           | 17          |                |                 |                 |
| Otsu rotation 90°              | 17          | 100            | 0               | 0               |
| Otsu vertical flip             | 17          | 100            | 0               | 0               |
|                                | # particles | Accordance / % | False negatives | False positives |
| Otsu + watershed               | 23          |                |                 |                 |
| Otsu + watershed rotation 90°  | 23          | 100            | 0               | 0               |
| Otsu + watershed vertical flip | 23          | 100            | 0               | 0               |

143

144

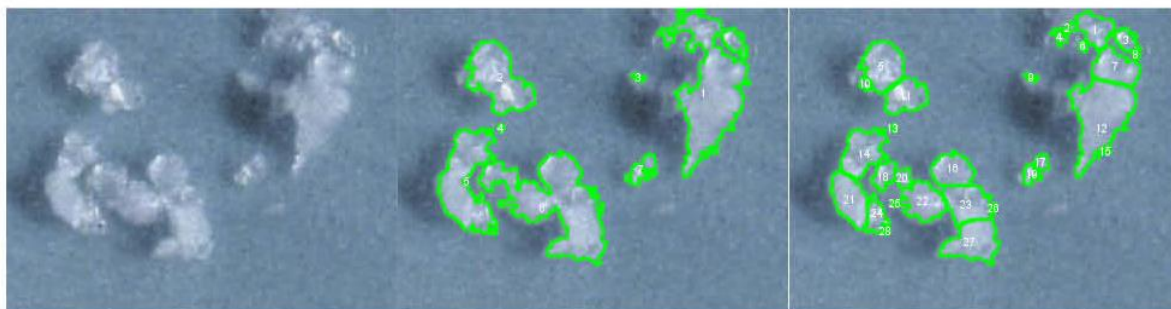

145  
 146 *Figure S17: Image reproduced from Löder et al. [3] Figure 9d with, permission from CSIRO*  
 147 *Publishing; “white particles” were looked for.*

148  
 149 *Table S11: Accuracy or validity of images from Figure S17.*

|                  | # particles | Accordance / % | False negatives | False positives |
|------------------|-------------|----------------|-----------------|-----------------|
| Human Expert     | 10          |                |                 |                 |
| Otsu             | 7           | 60             | 4               | 1               |
| Otsu + watershed | 28          | 100            | 0               | 18              |

150  
 151  
 152 *Table S12: Reliability or precision of images from Figure S17.*

|                                | # particles | Accordance / % | False negatives | False positives |
|--------------------------------|-------------|----------------|-----------------|-----------------|
| Otsu                           | 7           |                |                 |                 |
| Otsu rotation 90°              | 7           | 100            | 0               | 0               |
| Otsu vertical flip             | 7           | 100            | 0               | 0               |
|                                | # particles | Accordance / % | False negatives | False positives |
| Otsu + watershed               | 28          |                |                 |                 |
| Otsu + watershed rotation 90°  | 28          | 100            | 0               | 0               |
| Otsu + watershed vertical flip | 28          | 100            | 0               | 0               |

153  
 154

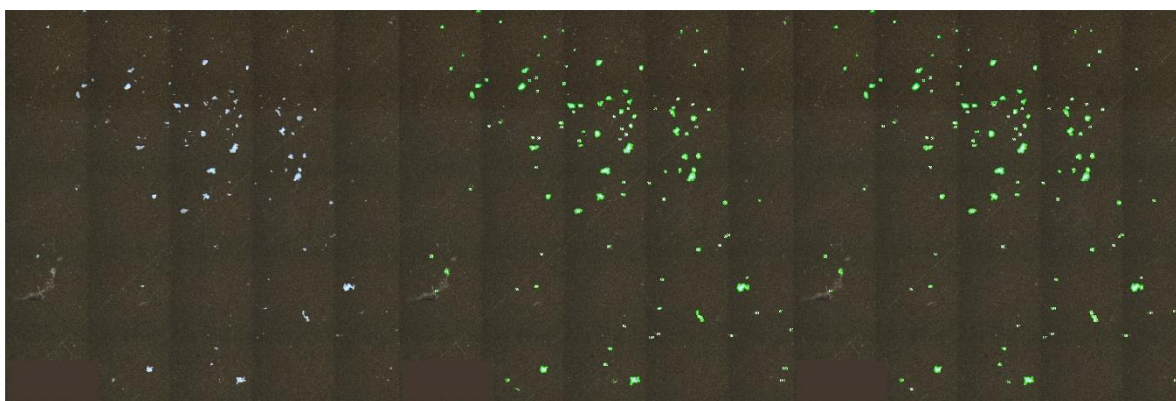

155

156 *Figure S18: Exemplary image of polystyrene particles on a gold filter under dark field illumination.*  
 157 *“white particles” were looked for.*

158 This image is the only one with very small particles compared to the overall image size. Therefore, the  
 159 min. pixels was set to 5.

160

161 *Table S13: Accuracy or validity of images from Figure S18.*

|                  | # particles | Accordance / % | False negatives | False positives |
|------------------|-------------|----------------|-----------------|-----------------|
| Human Expert     | 127         |                |                 |                 |
| Otsu             | 115         | 90.6           | 12              | 0               |
| Otsu + watershed | 120         | 92.9           | 9               | 2               |

162

163 *Table S14: Reliability or precision of images from Figure S18.*

|                                | # particles | Accordance / % | False negatives | False positives |
|--------------------------------|-------------|----------------|-----------------|-----------------|
| Otsu                           | 115         |                |                 |                 |
| Otsu rotation 90°              | 115         | 100            | 0               | 0               |
| Otsu vertical flip             | 115         | 100            | 0               | 0               |
|                                | # particles | Accordance / % | False negatives | False positives |
| Otsu + watershed               | 120         |                |                 |                 |
| Otsu + watershed rotation 90°  | 120         | 100            | 0               | 0               |
| Otsu + watershed vertical flip | 120         | 100            | 0               | 0               |

164

165

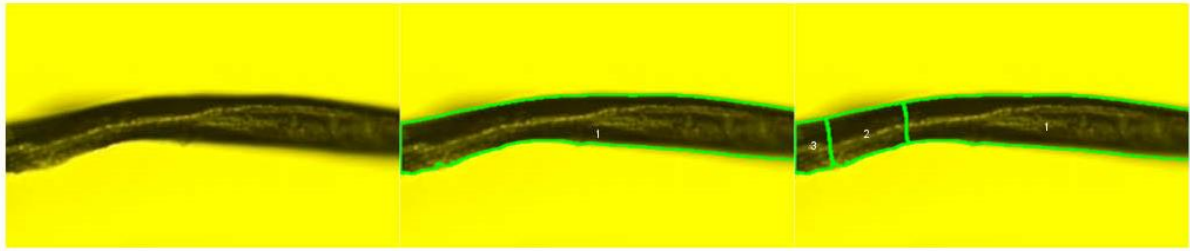

166

167 *Figure S19: Image from K ppler et al. 2016 [4] Figure 1d; “dark particles” were looked for.*

168

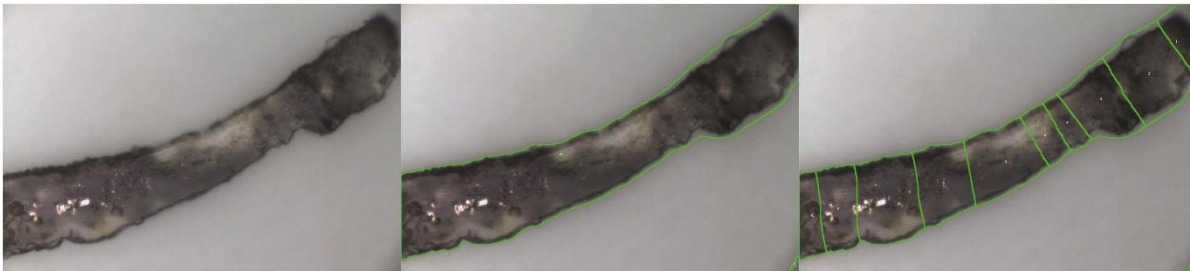

169

170 *Figure S20: Exemplary image of a polystyrene fibre on a polycarbonate filter under bright field*  
171 *illumination. “dark particles” were looked for.*

172

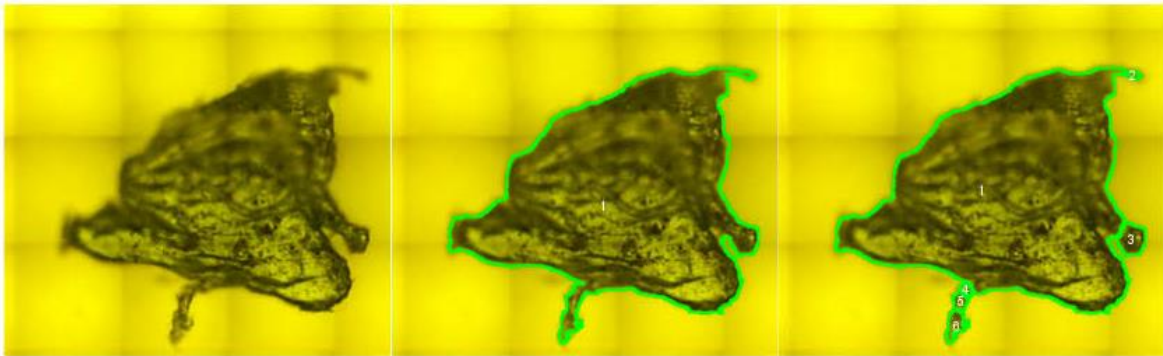

173

174 *Figure S21: Image from K ppler et al. 2016 [4] Figure 1c; “dark particles” were looked for.*

175



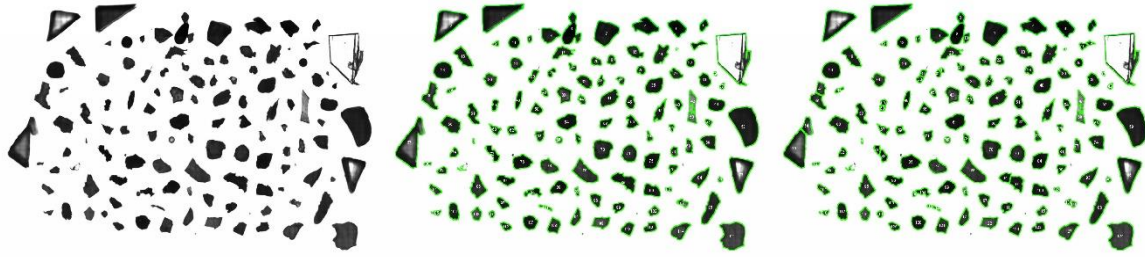

176

177 *Figure S22: Image from Frère et al. [5] Figure 3; “dark particles” were looked for.*

178

179 *Table S15: Accuracy or validity of images from Figure S22.*

|                  | # particles | Accordance / % | False negatives | False positives |
|------------------|-------------|----------------|-----------------|-----------------|
| Human Expert     | 119         |                |                 |                 |
| Otsu             | 114         | 95.0%          | 6               | 1               |
| Otsu + watershed | 127         | 96.6%          | 4               | 12              |

180

181

182 *Table S16: Reliability or precision of images from Figure S22.*

|                                | # particles | Accordance / % | False negatives | False positives |
|--------------------------------|-------------|----------------|-----------------|-----------------|
| Otsu                           | 114         |                |                 |                 |
| Otsu vertical flip             | 114         | 100            | 0               | 0               |
|                                | # particles | Accordance / % | False negatives | False positives |
| Otsu + watershed               | 127         |                |                 |                 |
| Otsu + watershed vertical flip | 127         | 100            | 0               | 0               |

183

184 90° values are missing for Figure S22, due to a limitation in length/width ratio that can be processed by  
 185 the open source program. However, all other images showed no deviation by 90° rotation. Therefore,  
 186 we recommend to rotate images with unsuitable length/width ratios.

187

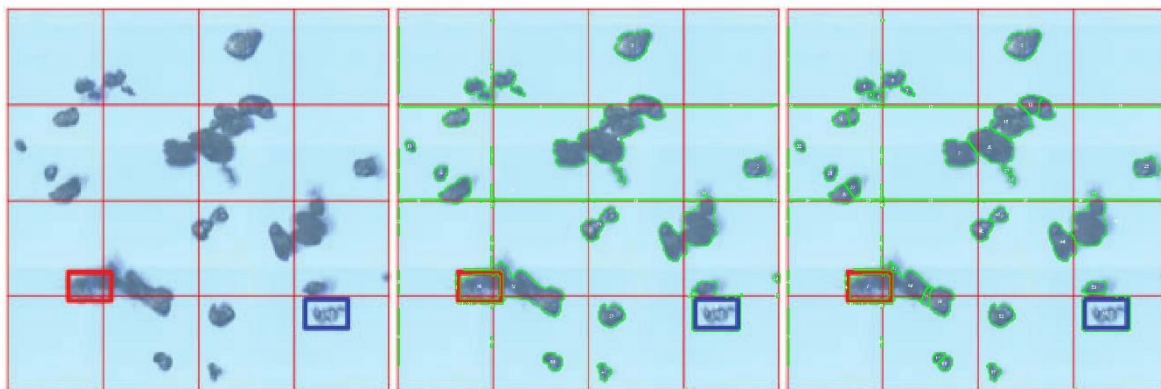

188

189 *Figure S23: Image reproduced from Löder et al. [3] Figure 1b, with permission from CSIRO*  
 190 *Publishing; “dark particles” were looked for.*

191

192 *Table S17: Accuracy or validity of images from Figure S23.*

|                  | # particles | Accordance / % | False negatives | False positives |
|------------------|-------------|----------------|-----------------|-----------------|
| Human Expert     | 30          |                |                 |                 |
| Otsu             | 42          | 60.0%          | 12              | 24              |
| Otsu + watershed | 68          | 93.3%          | 2               | 40              |

193

194

195 *Table S18: Reliability or precision of images from Figure S23.*

|                                | # particles | Accordance / % | False negatives | False positives |
|--------------------------------|-------------|----------------|-----------------|-----------------|
| Otsu                           | 42          |                |                 |                 |
| Otsu rotation 90°              | 42          | 100            | 0               | 0               |
| Otsu vertical flip             | 42          | 100            | 0               | 0               |
|                                | # particles | Accordance / % | False negatives | False positives |
| Otsu + watershed               | 68          |                |                 |                 |
| Otsu + watershed rotation 90°  | 68          | 100            | 0               | 0               |
| Otsu + watershed vertical flip | 68          | 100            | 0               | 0               |

196

197

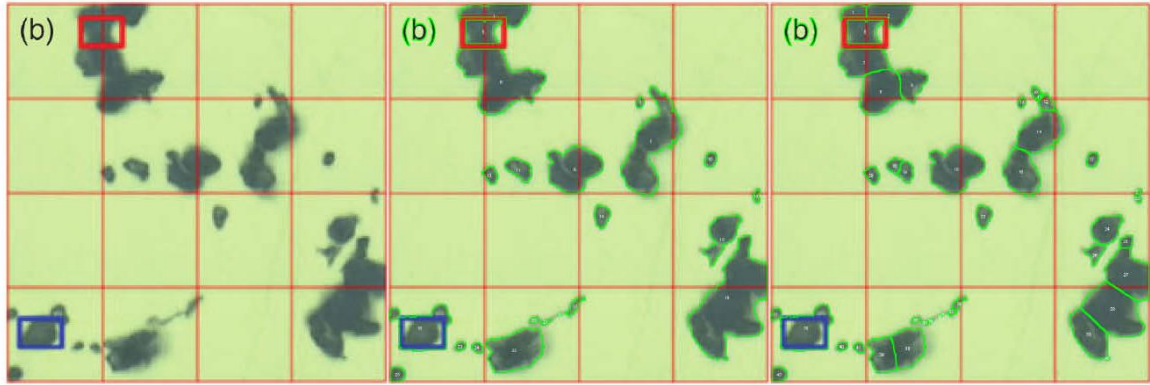

198

199 *Figure S24: Image reproduced from Löder et al. [3] Figure 2b, with permission from CSIRO*  
 200 *Publishing; “dark particles” were looked for.*

201

202 *Table S19: Accuracy or validity of images from Figure S24.*

|                  | # particles | Accordance / % | False negatives | False positives |
|------------------|-------------|----------------|-----------------|-----------------|
| Human Expert     | 27          |                |                 |                 |
| Otsu             | 22          | 70.4%          | 8               | 3               |
| Otsu + watershed | 40          | 92.6%          | 2               | 15              |

203

204

205 *Table S20: Reliability or precision of images from Figure S24.*

|                                | # particles | Accordance / % | False negatives | False positives |
|--------------------------------|-------------|----------------|-----------------|-----------------|
| Otsu                           | 22          |                |                 |                 |
| Otsu rotation 90°              | 22          | 100            | 0               | 0               |
| Otsu vertical flip             | 22          | 100            | 0               | 0               |
|                                | # particles | Accordance / % | False negatives | False positives |
| Otsu + watershed               | 40          |                |                 |                 |
| Otsu + watershed rotation 90°  | 40          | 100            | 0               | 0               |
| Otsu + watershed vertical flip | 40          | 100            | 0               | 0               |

206

207

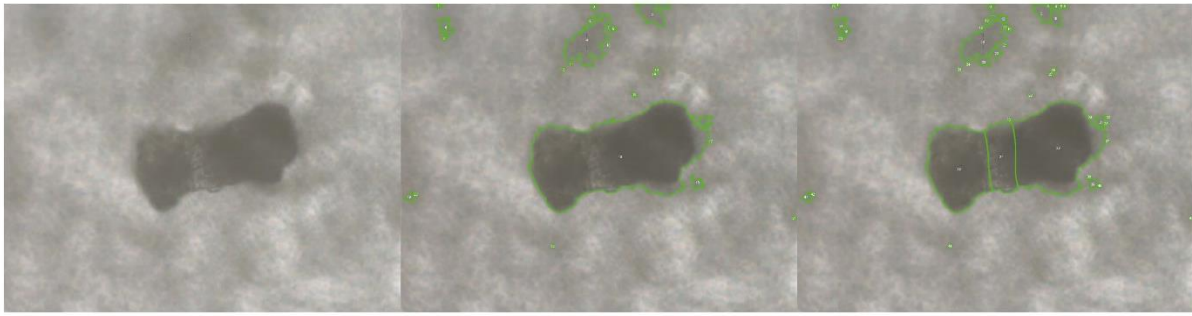

208

209

210 *Figure S25: Image from Domogalla-Urbansky and Anger et al. [6] Figure 2c; “dark particles” were*  
211 *looked for.*

212

213

#### 214 References

- 215 1. Ossmann BE, Sarau G, Schmitt SW, Holtmannspotter H, Christiansen SH, Dicke W. Development  
216 of an optimal filter substrate for the identification of small microplastic particles in food by micro-  
217 Raman spectroscopy. *Anal Bioanal Chem.* 2017. doi:10.1007/s00216-017-0358-y.
- 218 2. Kappler A, Fischer M, Scholz-Bottcher BM, Oberbeckmann S, Labrenz M, Fischer D et al.  
219 Comparison of mu-ATR-FTIR spectroscopy and py-GCMS as identification tools for microplastic  
220 particles and fibers isolated from river sediments. *Anal Bioanal Chem.* 2018. doi:10.1007/s00216-018-  
221 1185-5.
- 222 3. Löder MGJ, Kuczera M, Mintenig S, Lorenz C, Gerdt G. Focal Plane Array Detector-Based Micro-  
223 Fourier-Transform Infrared Imaging for the Analysis of Microplastics in Environmental Samples.  
224 *Environ Chem.* 2015;12(5):563-81. doi:10.1071/en14205.
- 225 4. Kappler A, Fischer D, Oberbeckmann S, Schernewski G, Labrenz M, Eichhorn KJ et al. Analysis of  
226 environmental microplastics by vibrational microspectroscopy: FTIR, Raman or both? *Anal Bioanal*  
227 *Chem.* 2016;408(29):8377-91. doi:10.1007/s00216-016-9956-3.
- 228 5. Frère L, Paul-Pont I, Moreau J, Soudant P, Lambert C, Huvet A et al. A semi-automated Raman  
229 micro-spectroscopy method for morphological and chemical characterizations of microplastic litter. *Mar*  
230 *Pollut Bull.* 2016;113(1):461-8. doi:<https://doi.org/10.1016/j.marpolbul.2016.10.051>.
- 231 6. Domogalla-Urbansky J, Anger PM, Ferling H, Rager F, Wiesheu AC, Niessner R et al. Raman  
232 microspectroscopic identification of microplastic particles in freshwater bivalves (*Unio pictorum*)  
233 exposed to sewage treatment plant effluents under different exposure scenarios. *Environmental science*  
234 *and pollution research international.* 2018. doi:10.1007/s11356-018-3609-3.

235
